# Supplementary material for: An ultra-wide sensing range film strain sensor based on a branch-shaped PAN-based carbon nanofiber and carbon black synergistic conductive network for human motion detection and human–machine interfaces
Source: Royal Society of Chemistry journal article supplement (doi:10.1039/d1tc05886j), 2022-01-01
Supplement: d1tc05886j1.pdf [file d1tc05886j1.pdf]

# Supporting Information

## Ultra-wide sensing range film strain sensor based on brunch-shaped carbon nanofibers and carbon black synergistic conductive network for human motion and human-machine interface

Xinyu Lu<sup>1</sup>, Yafei Qin<sup>\*1</sup>, Xinzhi Chen<sup>\*2</sup>, Cheng Peng<sup>2</sup>, Youpeng Yang<sup>1</sup>, Yu Zeng<sup>1</sup>

<sup>1</sup> Faculty of Mechanical and Electrical Engineering, Kunming University of Science and technology, Jing-ming,727, Yun nan Province, People's Republic of China.

<sup>2</sup> Faculty of Chemical Engineering, Kunming University of Science and technology, Jing-ming,727, Yun nan Province, People's Republic of China.

### Corresponding Authors

Yafei Qin, qinyafei\_kmust@foxmail.com  
Xinzhi Chen, xzchen001@hotmail.com

**KEYWORDS:** film strain sensor, branch-shaped PAN-based carbon nanofiber, wide sensing range, ultra-low detection, human-machine interface, human motion detection.

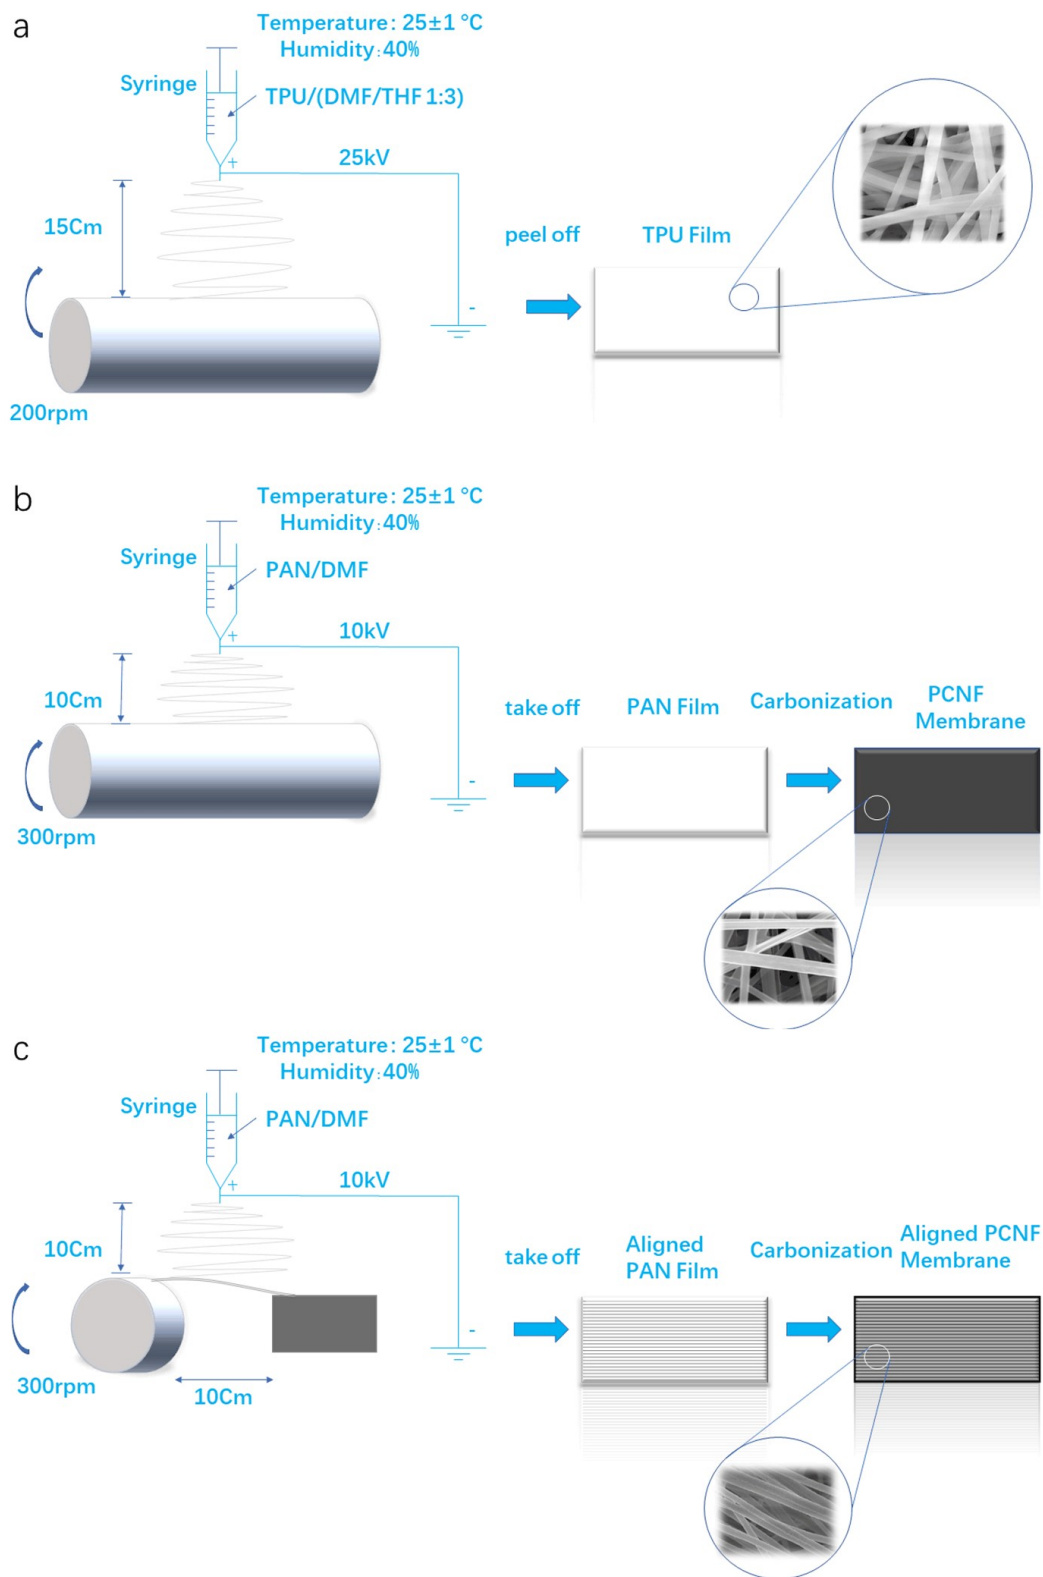

**Figure S1** The fabrication of TPU membrane in (a) normal PAN-based carbon nanofiber membrane(b) and aligned PCNF membrane(c), respectively.

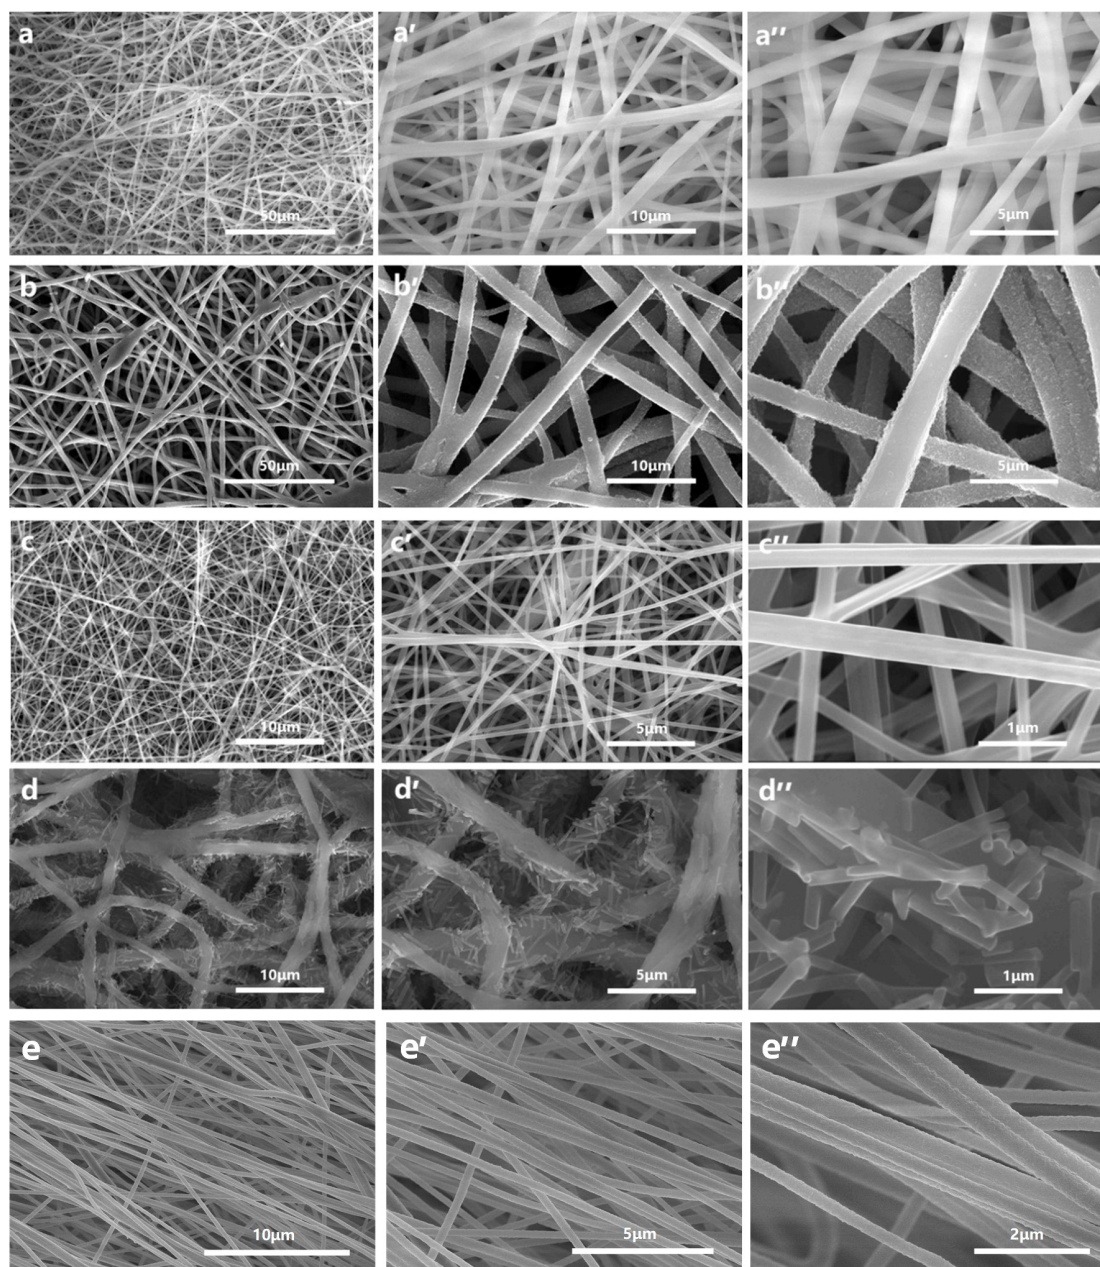

**Figure S2** The morphology of TPU, TPU-CB, carbonized bPCNF membrane, surface of TPU-bPCNF and aligned rPCNF membrane. The smooth TPU surface and evenly distributed TPU fibers with diameters 1-2  $\mu\text{m}$  can be seen clearly in **Figure S2a**. **Figure S2b** exhibits that massive carbon black particles were firmly anchored on the surface of TPU nanofiber by ultrasonication. PAN (Polyacrylonitrile) was used by electrospinning and followed carbonizing. **Figure S2c** presents the surface of

carbonized PAN. After carbonization, mean diameters was in the range of 120-220 nm. The surface of as-designed film strain sensor was also visualized by SEM and presented in **Figure S2d**. It can be clearly seen that abundant PCNFs were firmly anchored on the TPU fiber after ultrasonication process. The rod-shaped PCNF with diameters range of 120-200 nm can be clearly discovered from the aligned PCNF membrane. The parallel PCNF was attributed by tensile force caused by the split electric field.

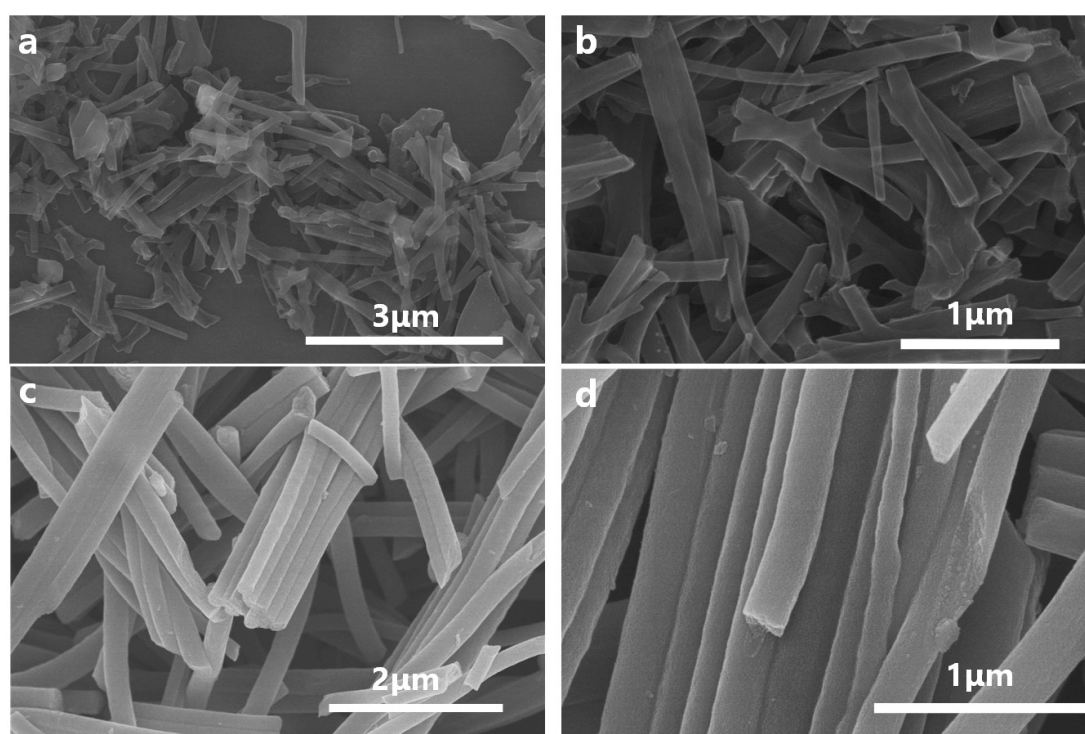

**Figure S3** the geometry of branch-shaped PCNF (a) 3um and (b) 1um and rod-shaped PCNF (c) 2um and (d) 1um magnification.

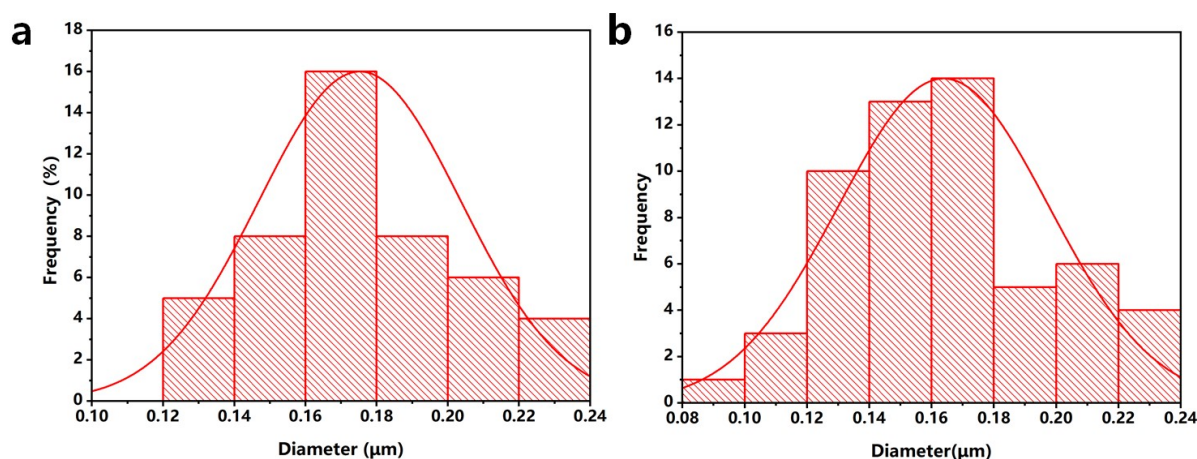

**Figure.S4** The diameter statistic of b-PCNF (a) and r-PCNF (b).

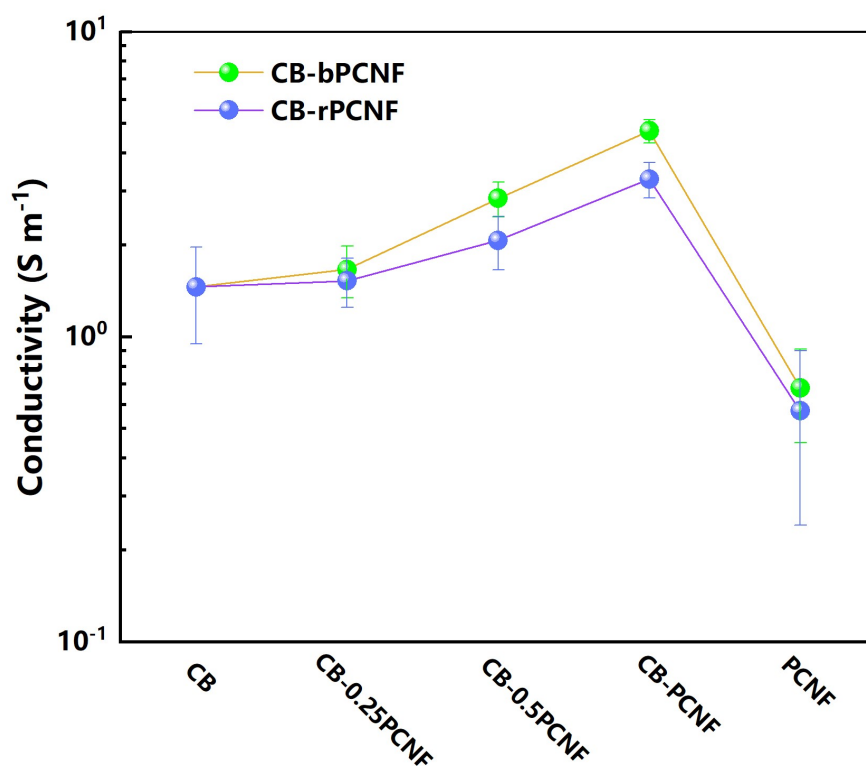

**Figure.S5** The relative mass fraction of r/b-PCNF as a function of conductivity.

**Table S1** Detail information of Figure S5

| Type         | Conductivity (S m <sup>-1</sup> ) | Difference Value | Standard Deviation |
|--------------|-----------------------------------|------------------|--------------------|
| CB           | 1.4575                            | /                | 0.51               |
| CB-0.25rPCNF | 1.5271                            |                  | 0.28               |
| CB-0.25bPCNF | 1.6614                            | 0.0696           | 0.32               |
| CB-0.5rPCNF  | 2.069                             |                  | 0.41               |
| CB-0.5bPCNF  | 2.843                             | 0.774            | 0.37               |
| CB-rPCNF     | 3.2862                            |                  | 0.44               |
| CB-bPCNF     | 4.735                             | 1.4488           | 0.41               |
| rPCNF        | 0.5714                            |                  | 0.3                |
| bPCNF        | 0.6802                            | 0.1088           | 0.23               |

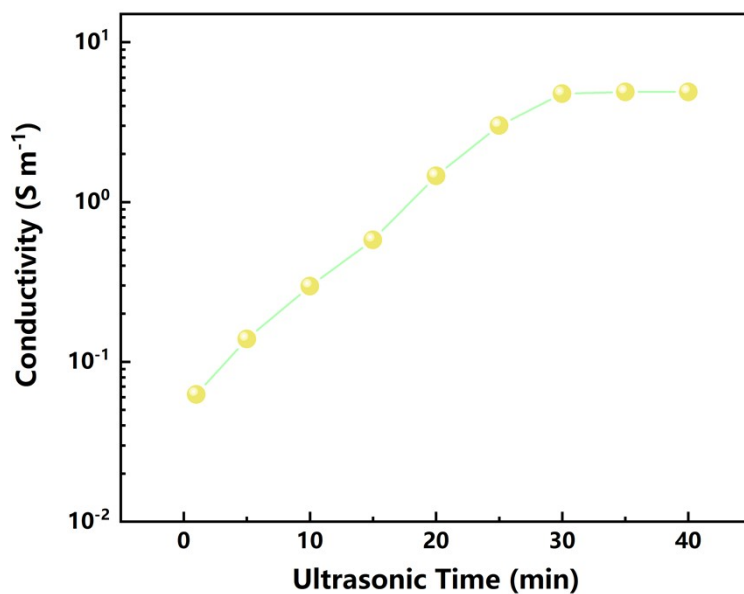

**Figure S6** The conductivity as the function of ultrasonic time for the TPU-CB/bPCNF (mass fraction ratio of CB 2mg/ml-bPCNF 2mg/ml, test length 1cm)

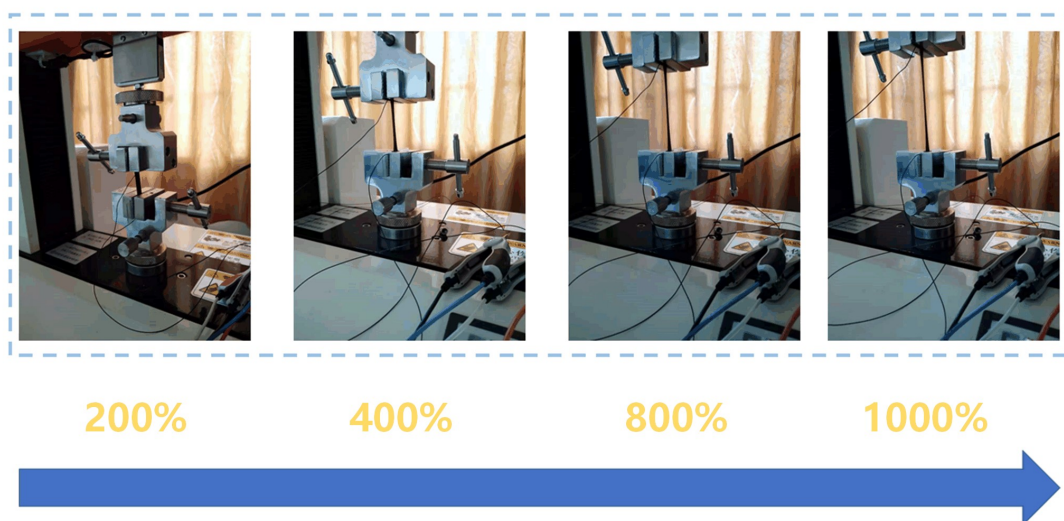

**Figure S7** The digital image of TPU-CB/bPCNF stretching process.

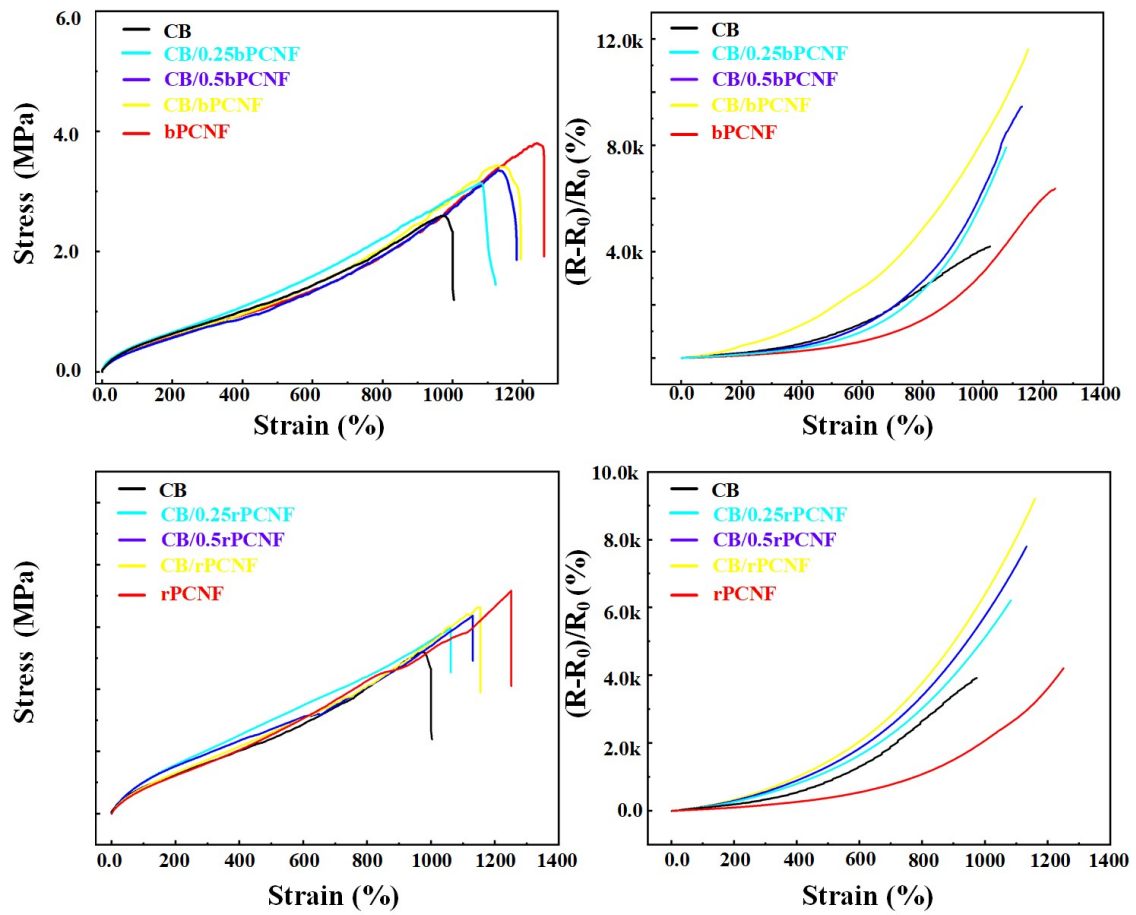

**Figure S8** The comparison of elongation vs tensile stress and sensing performance of nine samples.

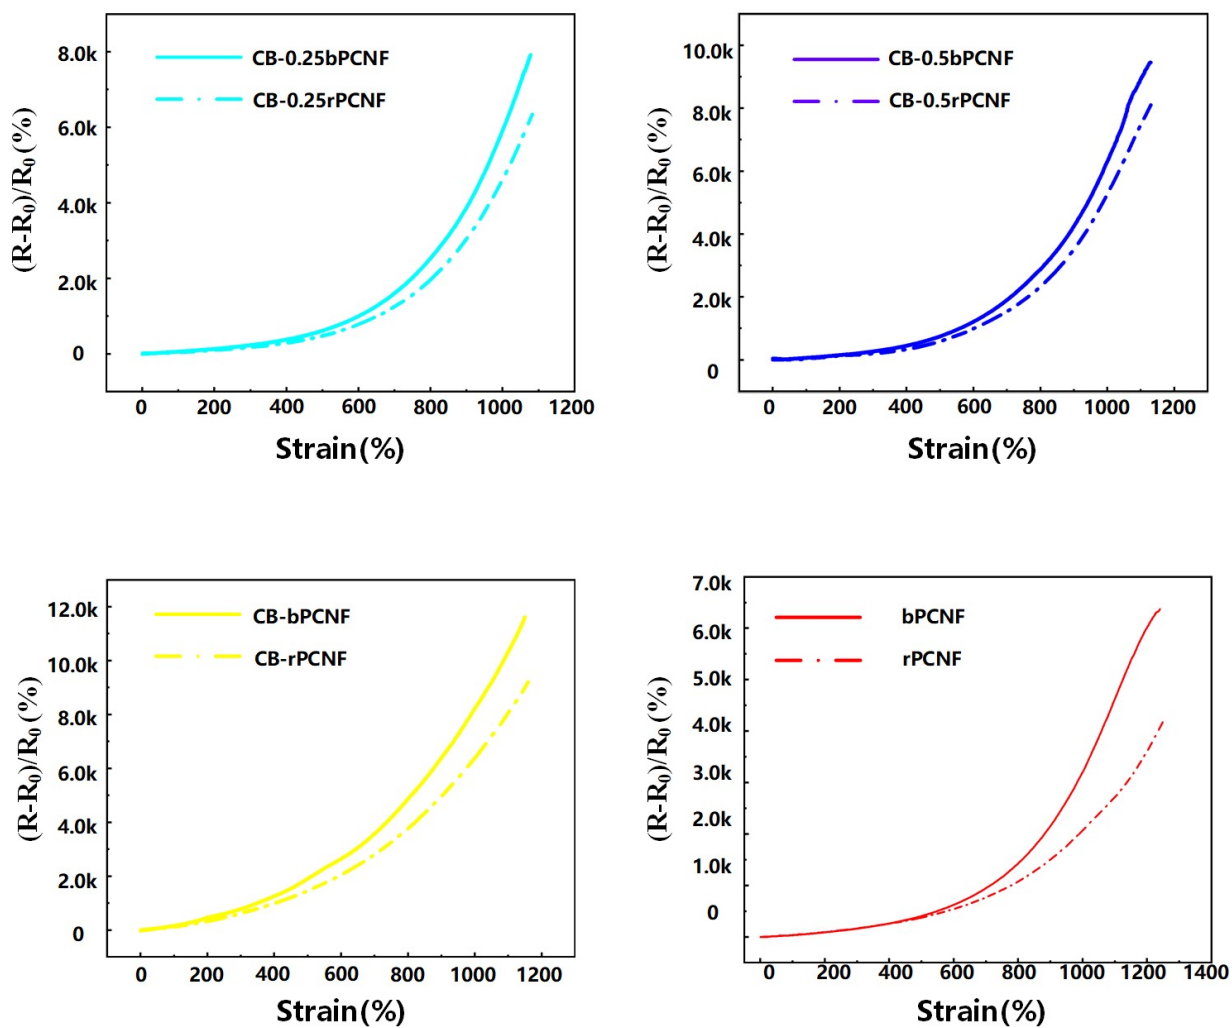

Figure S9 Detail comparison of sensing performance of nine samples.

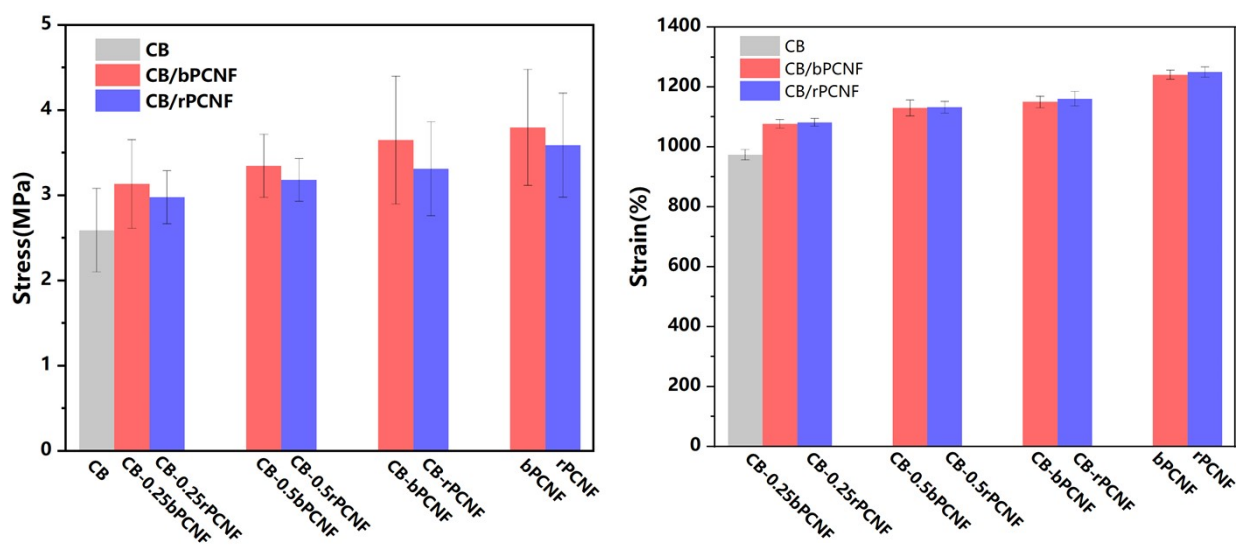

Figure S10 The comparison of maximum elongation and tensile stress of nine samples.



**Table S2** Detail data for **Figure S10**

| Type         | Max Strain (%) | Standard Deviation | Max Stress (MPa) | Standard Deviation |
|--------------|----------------|--------------------|------------------|--------------------|
| CB           | 937.93         | 17.29              | 2.592            | 0.49               |
| CB-0.25bPCNF | 1077.36        | 14.32              | 3.135            | 0.52               |
| CB-0.25rPCNF | 1082           | 12.97              | 2.98             | 0.31               |
| CB-0.5bPCNF  | 1130           | 26.37              | 3.348            | 0.37               |
| CB-0.5rPCNF  | 1132           | 19.63              | 3.183            | 0.25               |
| CB-bPCNF     | 1150           | 19.11              | 3.65             | 0.75               |
| CB-rPCNF     | 1161           | 24.32              | 3.314            | 0.55               |
| bPCNF        | 1241           | 15.35              | 3.8              | 0.68               |
| rPCNF        | 1250           | 17.54              | 3.589            | 0.61               |

**Table.S3** The comparison between sensing range of reported work and our work

| Materials                     | Min Sensing range(%) | Max Sensing Range(%)            | Gauge Factor                     | Ref.      |
|-------------------------------|----------------------|---------------------------------|----------------------------------|-----------|
| Cotton fabric/Graphene        | 0.4%                 | 75%                             | 2.01-2.49                        | 31        |
| TPU/Ecoflex/Carbon Black      | 0.5%                 | 225%                            | 3186.4                           | 16        |
| PDMS/Carbon Nanotube/Graphene | 0.5%                 | 550%                            | 45.6-186.5                       | 17        |
| TPU/MWCNT/Graphene/Ag/SR      | 0.5%                 | 650%                            | 1.2-16.5                         | 32        |
| TPU/Carbon Nanotube           | 0.05%                | 600%                            | Not Given                        | 33        |
| TPU/MXene                     | 0.05%                | 270%                            | 1000                             | 34        |
| PDMS/Au/SWCNT                 | 0.1%                 | 100%                            | $3.4 \times 10^6$                | 4         |
| PU/CNF                        | Not Given            | 300%                            | 72                               | 27        |
| PDMS/Aligned CNF              | Not Given            | Over 30%                        | 180(parallel)<br>0.3 (vertical)  | 28        |
| TPU-CNF(Graphene-reinforced)  | 0.1%                 | 38%(parallel)<br>60% (vertical) | 10.5 (parallel)<br><2 (vertical) | 29        |
| TPU-CB/PCNF                   | 0.1%                 | 1000%                           | 18.92                            | This Work |
